# Supplementary material for: Vaccination schedule and age influence impaired responsiveness to hepatitis B vaccination: a randomized trial in Central Asia
Source: Research Square preprint supplement (doi:10.21203/rs.3.rs-5427492/v1), 2024-11-15
Supplement: Supplementary file 2 [file bb1064f8dec2d4f4c07a690e.pdf]

|                                                                                               | <b>Age groups</b> | <b>N</b>       | <b>0-1-3</b> | <b>0-1-6</b>   | <b>P value</b>      |
|-----------------------------------------------------------------------------------------------|-------------------|----------------|--------------|----------------|---------------------|
| Participants, N                                                                               | All               | 105            | 53           | 52             | n/a                 |
|                                                                                               | <20               | 5              | 4            | 1              | n/a                 |
|                                                                                               | 20-39             | 25             | 11           | 14             | n/a                 |
|                                                                                               | 30-39             | 21             | 11           | 10             | n/a                 |
|                                                                                               | 40-49             | 27             | 15           | 12             | n/a                 |
|                                                                                               | 50-59             | 20             | 11           | 9              | n/a                 |
|                                                                                               | ≥60               | 7              | 1            | 6              | n/a                 |
|                                                                                               | <hr/>             |                |              |                |                     |
| Median age in years<br>(range)                                                                | All               | 40 (17-66)     | 40 (17-61)   | 41.5 (19-66)   | 0.3769 <sup>a</sup> |
|                                                                                               | <20               | 18 (17-19)     | 18 (17-19)   | n/a            | n/a                 |
|                                                                                               | 20-29             | 26 (21-29)     | 25 (21-29)   | 26 (22-29)     | 0.5086 <sup>a</sup> |
|                                                                                               | 30-39             | 35 (30-39)     | 35 (30-37)   | 36 (31-39)     | 0.4971 <sup>a</sup> |
|                                                                                               | 40-49             | 45 (40-49)     | 45 (40-49)   | 46 (41-49)     | 0.4156 <sup>a</sup> |
|                                                                                               | 50-59             | 56 (50-59)     | 55 (51-59)   | 56 (53-59)     | 0.9801 <sup>a</sup> |
|                                                                                               | ≥60               | 61 (60-66)     | n/a          | 61 (60-66)     | n/a                 |
|                                                                                               | <hr/>             |                |              |                |                     |
| Female sex, n (%)                                                                             | All               | 68 (64.8%)     | 36 (67.9%)   | 32 (61.5%)     | 0.4934 <sup>b</sup> |
|                                                                                               | <20               | 4 (3.8%)       | 4 (7.5%)     | 0 (0%)         | 0.0434 <sup>b</sup> |
|                                                                                               | 20-29             | 13 (12.4%)     | 7 (13.2%)    | 6 (11.5%)      | 0.7952 <sup>b</sup> |
|                                                                                               | 30-39             | 11 (10.5%)     | 7 (13.2%)    | 4 (7.7%)       | 0.3562 <sup>b</sup> |
|                                                                                               | 40-49             | 19 (18.1%)     | 9 (17.0%)    | 10 (19.2%)     | 0.7647 <sup>b</sup> |
|                                                                                               | 50-59             | 16 (15.2%)     | 9 (17.0%)    | 7 (13.5%)      | 0.6159 <sup>b</sup> |
|                                                                                               | ≥60               | 5 (4.8%)       | 0 (0%)       | 5 (9.6%)       | 0.0207 <sup>b</sup> |
|                                                                                               | <hr/>             |                |              |                |                     |
| Median time between 3 <sup>rd</sup><br>dose and 4 <sup>th</sup> blood draw in<br>days (range) | All               | 190 (19-275)   | 214 (25-275) | 185.5 (19-249) | 0.0105 <sup>a</sup> |
|                                                                                               | <20               | 60 (33-217)    | 47 (33-79)   | n/a            | n/a                 |
|                                                                                               | 20-29             | 145 (28-258)   | 214 (52-258) | 47 (28-204)    | 0.0026 <sup>a</sup> |
|                                                                                               | 30-39             | 210 (19-266)   | 224 (31-266) | 195.5 (19-229) | 0.2160 <sup>a</sup> |
|                                                                                               | 40-49             | 193 (25-275)   | 200 (25-275) | 168.5 (28-217) | 0.6566 <sup>a</sup> |
|                                                                                               | 50-59             | 189.5 (25-259) | 243 (28-259) | 186 (25-210)   | 0.1460 <sup>a</sup> |
|                                                                                               | ≥60               | 190 (28-256)   | n/a          | 190 (28-249)   | n/a                 |
