# Supplementary material for: Vaccination schedule and age influence impaired responsiveness to hepatitis B vaccination: a randomized trial in Central Asia
Source: Research Square preprint supplement (doi:10.21203/rs.3.rs-5427492/v1), 2024-11-15
Supplement: Supplementary file 3 [file ed5d279a06ca7aedbff8b7df.pdf]

| <b>Age group</b> | <b>M1</b>             | <b>M3/M6</b>              | <b>M4/M7</b>              | <b>P value <sup>a</sup></b> |
|------------------|-----------------------|---------------------------|---------------------------|-----------------------------|
| <20              | 20.13<br>(0.33, 1225) | 121.90<br>(44.10, 337.20) | 126.90<br>(34.55, 466.10) | 0.3673                      |
| 20-29            | 0.13<br>(0.03, 0.49)  | 8.15<br>(2.59, 25.67)     | 67.31<br>(34.39, 131.8)   | <0.0001                     |
| 30-39            | 0.06<br>(0.01, 0.27)  | 11.05<br>(2.92, 41.75)    | 36.70<br>(16.47, 81.76)   | <0.0001                     |
| 40-49            | 0.16<br>(0.05, 0.52)  | 1.38<br>(0.35, 5.47)      | 16.74<br>(6.07, 46.18)    | <0.0001                     |
| 50-59            | 0.47<br>(0.18, 1.21)  | 0.57<br>(0.11, 2.91)      | 16.60<br>(3.30, 83.57)    | <0.0001                     |
| ≥60              | 1.19<br>(0.15, 9.40)  | 0.16<br>(0.004, 5.50)     | 5.3<br>(0.09, 311.60)     | 0.5788                      |
