# Supplementary figures and images for: Vaccination schedule and age influence impaired responsiveness to hepatitis B vaccination: a randomized trial in Central Asia
Source: Research Square preprint supplement (doi:10.21203/rs.3.rs-5427492/v1), 2024-11-15

### Age group <40

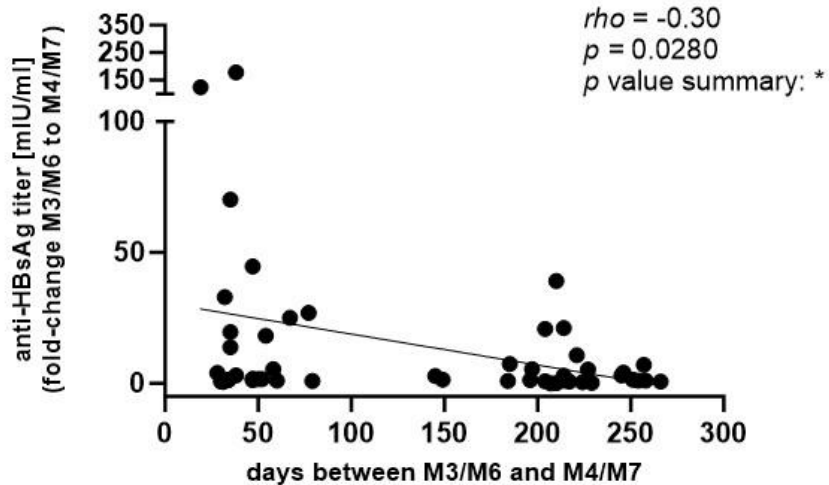

### Age group $\geq 40$

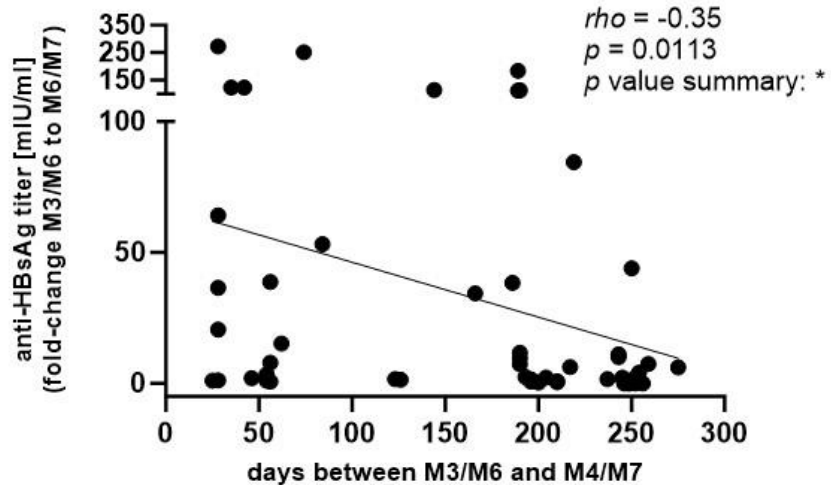

Supplement: Supplementary file 1 [file 0251e35dea1ed2709d42082c.pdf]
